# Supplementary material
Source: PubMed Central journal article supplement (PMC5649372)
Supplement: NIHMS911097-supplement-supplement_1.pdf [file NIHMS911097-supplement-supplement_1.pdf]

## Supplementary figures

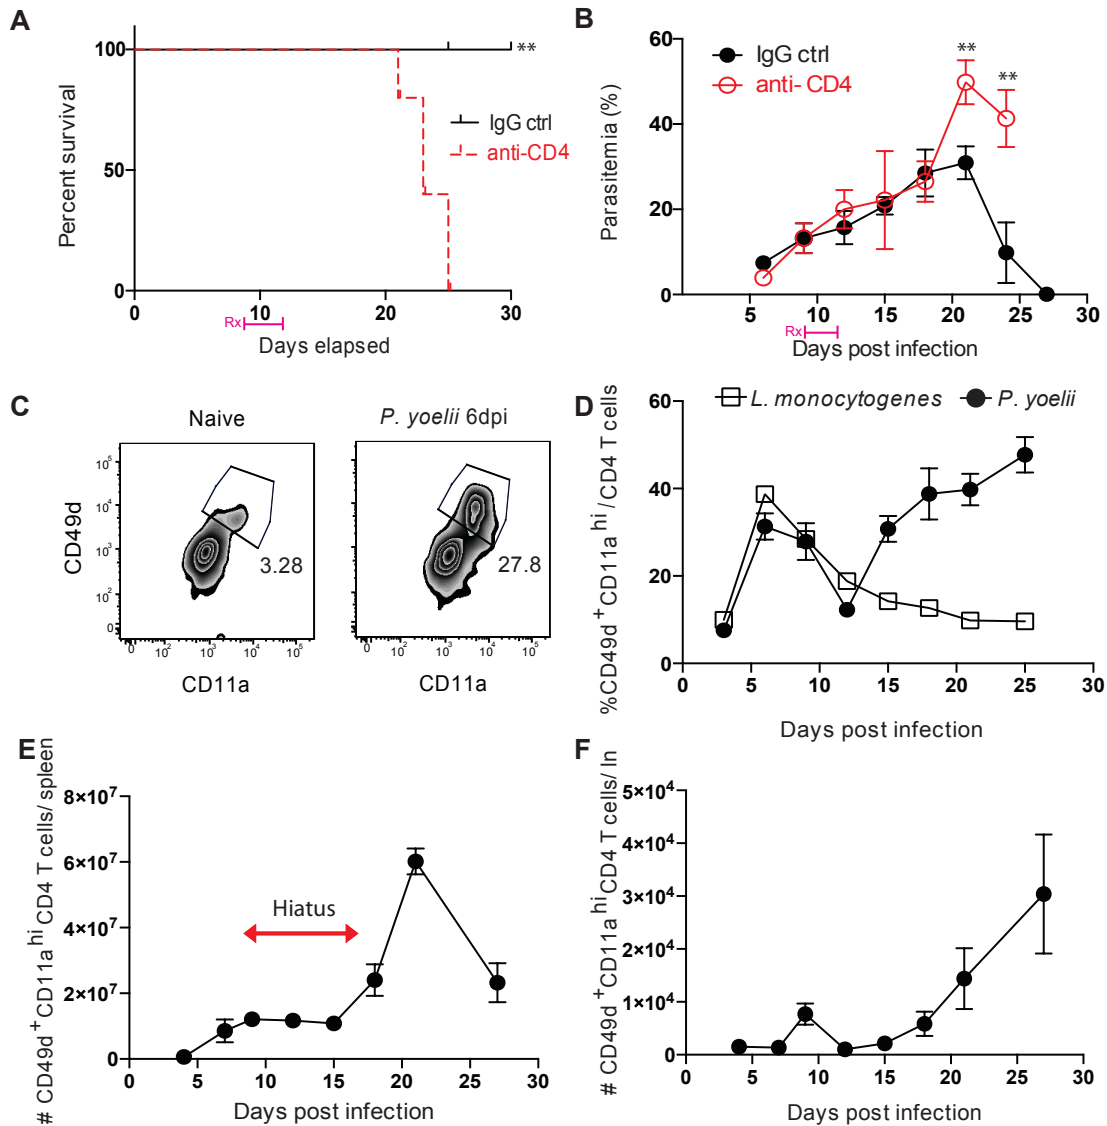

### Supplementary figure 1: Helper T cells are critical in control of mouse malaria, but exhibit atypical kinetics of response to infection.

(A-B) Kinetics of survival (A) and parasitemia (B) in *Py* 17XNL infected C57BL/6 mice with or without CD4 T cell depletion on days 9 and 11 post infection (red line). (C-F) Representative flow plots showing surrogate markers (CD11a<sup>hi</sup>, CD49d<sup>+</sup>) for activated, pathogen-specific CD4 T cells in blood in a naïve or *Py* 17XNL infected mouse (C). Numbers represent frequencies in blood (D) or absolute numbers in spleen or lymph nodes (E-F) of pathogen-specific CD4 T cells after *L. monocytogenes* (D) or *Py* (D-F) infections in C57BL/6 mice. All data represent 1 of 3 separate experiments, each with at least 5 mice per group and error bars represent mean  $\pm$  s.e.m. \*\* indicates  $P \leq 0.01$  comparing the treatment and control groups using chi square (A) or two-tailed student t-tests (B).

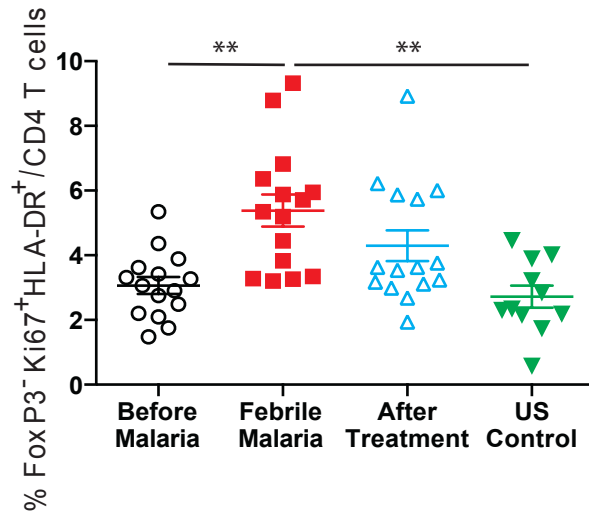

**Supplementary figure 2: Helper T cells expand during malaria in humans.**

Frequency of activated non-Treg CD4 T cells in PBMCs in a cohort of children in Mali before, during and after acute febrile malaria, compared to that of healthy controls in the United States. Each data point indicates a subject and error bars represent mean  $\pm$  s.e.m. \* or \*\* indicates  $P \leq 0.05$  or  $0.01$  respectively comparing the indicated groups using one-way ANOVA with Tukey's correction ( $F_{3,52}=8.31$ ).

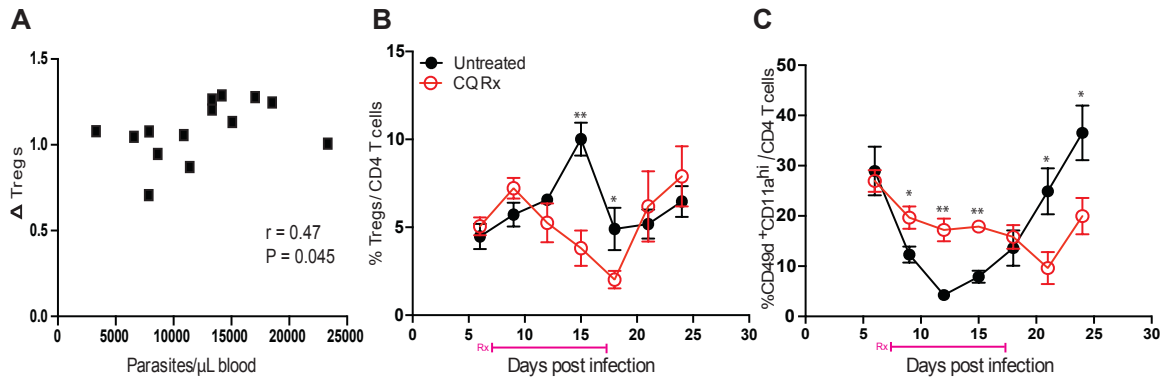

**Supplementary figure 3: Treg frequencies positively correlate with parasite densities in blood and restrained Th cell expansion.**

(A) Spearman rank correlation between parasitemia and fold change in Tregs during acute febrile malaria, in a cohort of children in Mali. (B-C) Kinetics of Foxp3<sup>+</sup> regulatory (B) or activated Th (C) cell frequencies in circulation of *Py* infected C57BL/6 mice treated with or without a subtherapeutic dose of chloroquine (CQ). Data represent 1 of 3 separate experiments, each with at least 5 mice per group and error bars represent mean  $\pm$  s.e.m. \* or \*\* indicates  $P \leq 0.05$  or  $0.01$  respectively comparing the treatment and control groups using two-tailed student t-tests at the indicated time points.

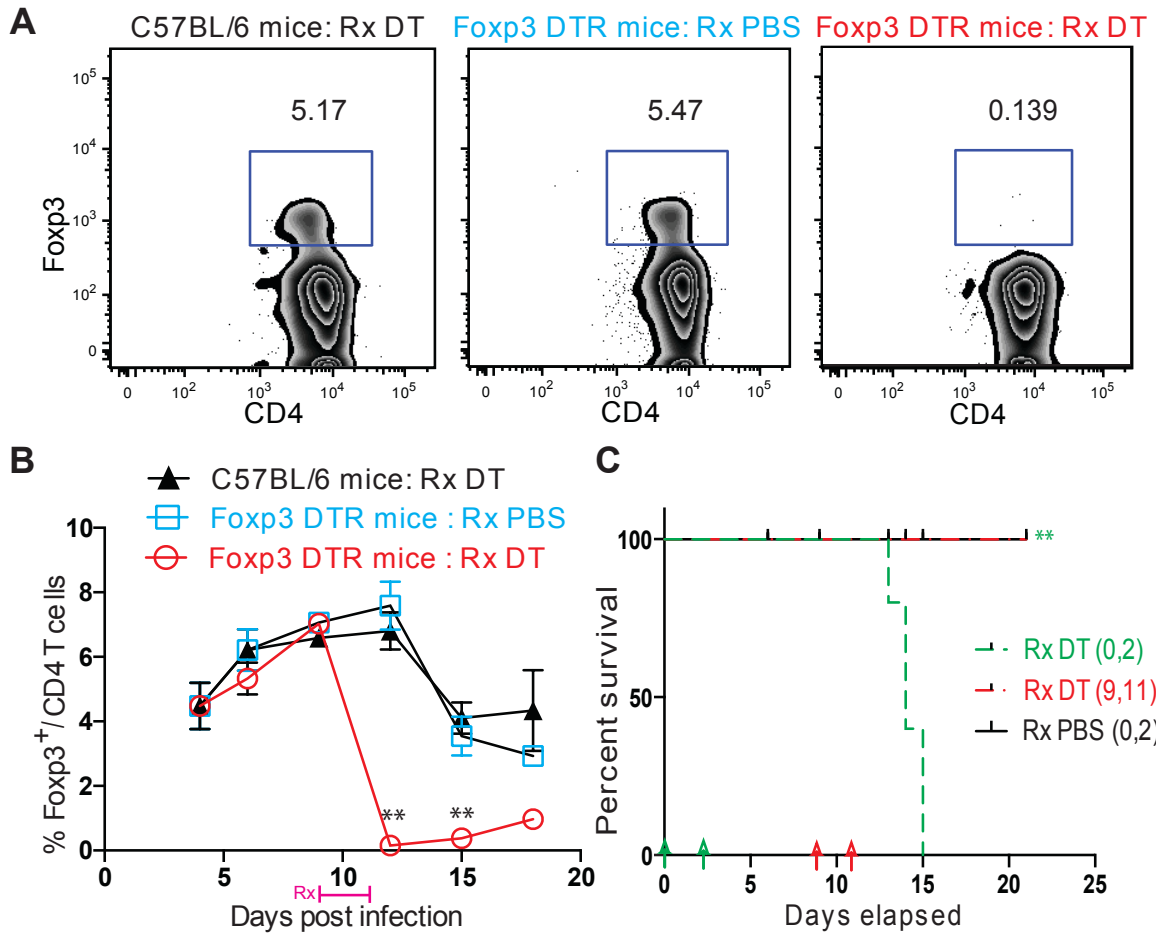

**Supplementary figure 4: Regulatory T cell depletion in malaria infected Foxp3-DTR mice treated with diphtheria toxin.**

(A) Representative flow plots from 12dpi showing frequencies of Foxp3<sup>+</sup> regulatory T cells in the blood of C57BL/6 or Foxp3 DTR mice infected with *Py* and treated with DT (Rx DT) or PBS control (Rx PBS) on days 9 and 11 post infection. (B) Kinetics of Foxp3<sup>+</sup> regulatory T cell frequencies in (A). Survival curve in Foxp3 DTR mice infected with *Py* and treated with DT (Rx DT) or PBS control (Rx PBS) on days 0 and 2 or 9 and 11 post infection. All Data represent 1 of 2 separate experiments with 3-5 mice per group, error bars represent mean  $\pm$  s.e.m and \*\* indicates  $P \leq 0.01$  comparing the Foxp3 DTR: RxDT and Foxp3 DTR: Rx PBS groups with two-way ANOVA and Tukey's correction, at the indicated time points (B;  $F_{2,60}=21.60$ ) or Mantel-Cox Chi square test (C).

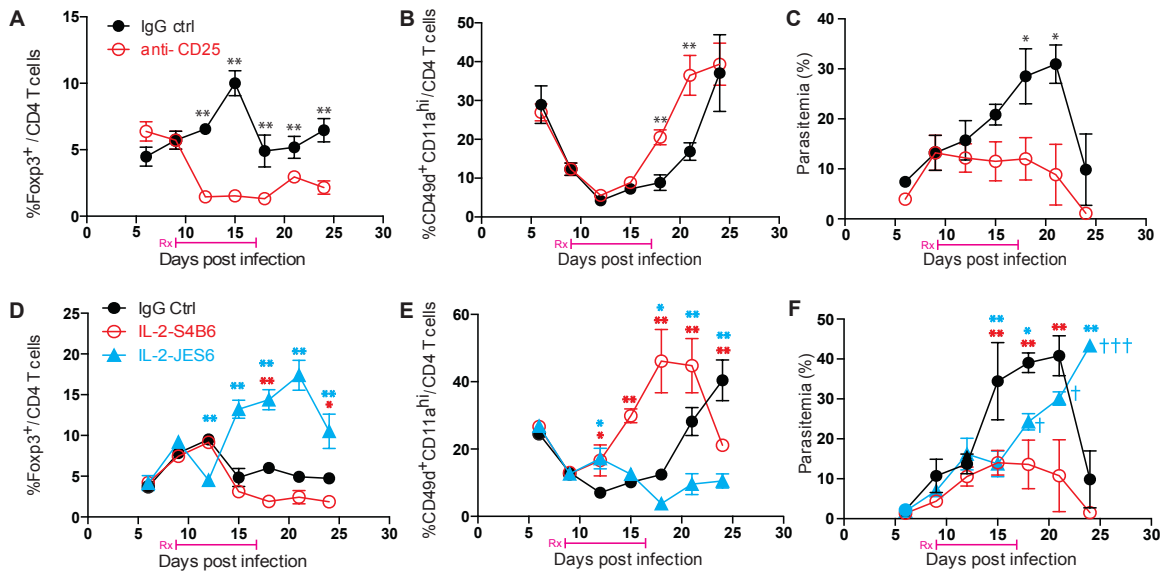

**Supplementary figure 5: Regulatory T cells control helper T cell responses and immunity to malaria.**

(A-C) Frequencies of Foxp3<sup>+</sup> regulatory T cells (A), activated CD4 T cells (B) and the frequency of infected RBCs (C) in C57BL/6 mice at various time points post infection with *Py* and treatment from days 9-16 (red bars) with anti-CD25 antibodies or control IgG as indicated. (D-F) Frequencies of Foxp3<sup>+</sup> regulatory T cells (D), activated CD4 T cells (E) and the frequency of infected RBCs (F) in C57BL/6 mice at various time points post infection with *Py* and treated from days 9-16 (red bars) with IL-2-S4B6 complex, IL-2-JES6 complex or control IgG as indicated. Data represent 1 of 3 separate experiments with 5 mice per group and presented as mean  $\pm$  s.e.m. Color coded \* or \*\* indicate  $P \leq 0.05$  or  $0.01$  respectively, comparing the corresponding treatment and control groups using two-tailed student t-tests (A-C) or two-way ANOVA with Tukey's correction (D:  $F_{2,77}=87.56$ , E:  $F_{2,77}=48.30$  and F:  $F_{2,77}=62.17$ ). † indicates the death of one mouse in the corresponding group.

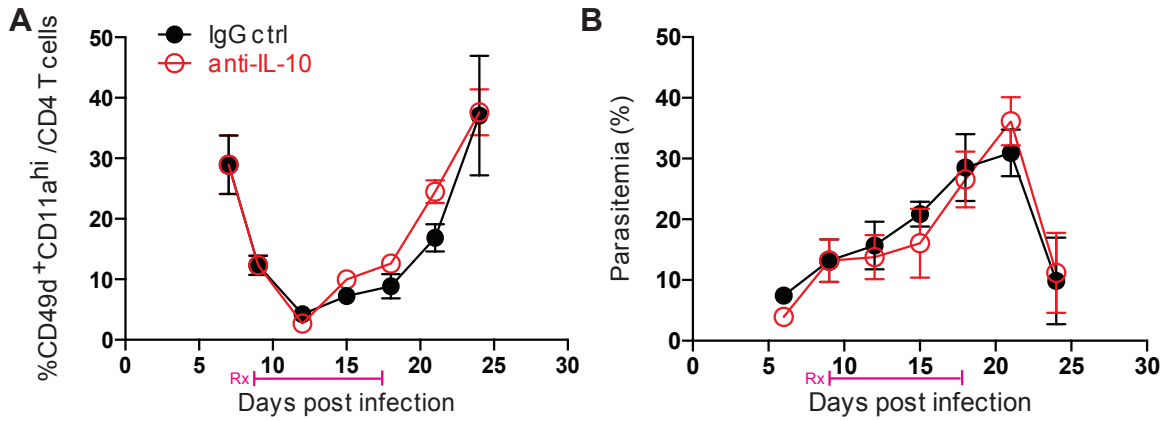

**Supplementary figure 6: Neutralizing IL-10 does not alter helper T cell responses or immunity to mouse malaria**

Frequencies of activated CD4 T cells (A) and frequency of infected RBCs (B) in C57BL/6 mice at various time points post infection with *Py*. Infected mice were treated from days 9-16 (red bars) with IL-10 neutralizing antibody or control IgG as indicated, in extended figure 4. Data represent 1 of 2 separate experiments, with 5 mice per group and is presented as mean  $\pm$  s.e.m.

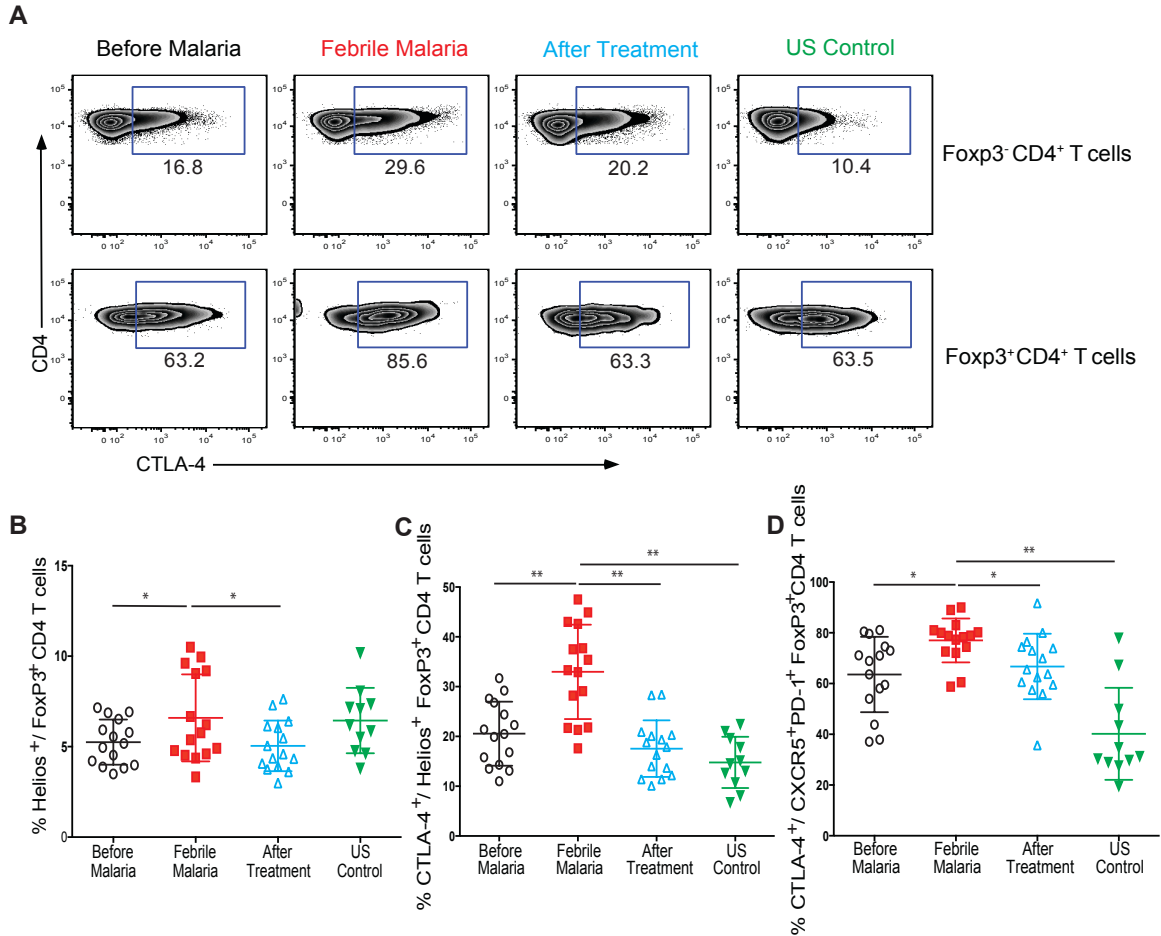

**Supplementary figure 7: CTLA-4 expression and frequencies of various suppressive T cell subsets augmented in human malaria.**

(A) Representative flow plots indicating the frequencies of CTLA-4 expressing Th cells and Tregs in a cohort of children in Mali before, during and after acute febrile malaria, compared to healthy controls. (B-D) Frequencies of Helios<sup>+</sup> Tregs (B), CTLA4<sup>+</sup> Helios<sup>+</sup> Tregs (C) or CTLA-4<sup>+</sup> follicular Tregs (D) in PBMCs in a cohort of children in Mali before, during and after acute febrile malaria, compared to that of healthy controls in the United States. Each data point indicates a subject and error bars represent mean  $\pm$  s.e.m. \* or \*\* indicates  $P \leq 0.05$  or  $0.01$  respectively comparing the indicated groups using one-way ANOVA with Tukey's correction (B:  $F_{1,4,19}=9$ , C:  $F_{3,52}=18.37$ , D:  $F_{3,52}=15.74$ ).

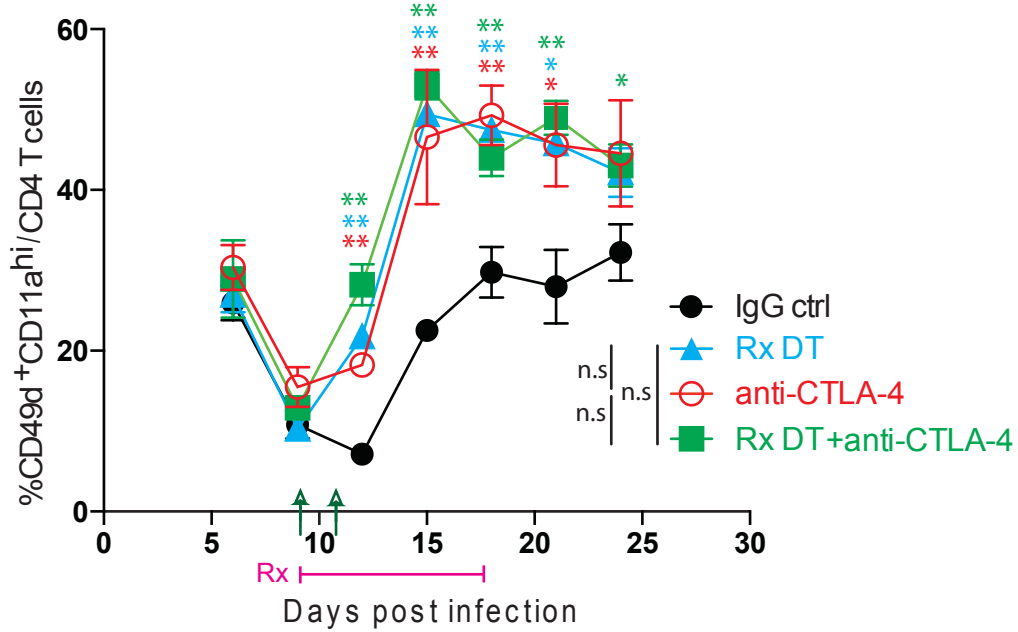

**Supplementary figure 8: CTLA-4 blockade under Treg depletion does not further alter the kinetics of Th cell responses in malaria.**

Frequencies of activated CD4 T cells in C57BL/6 mice at various time points post infection with *Py* and treated with DT (9 and 11dpi, green arrows) and/or anti-CTLA-4 or control IgG as in Figure 3 (A). Data represent 1 of 2 separate experiments, each with 5 mice per group and is presented as mean  $\pm$  s.e.m. Color coded \* or \*\* indicate  $P \leq 0.05$  or  $0.01$  respectively, comparing the corresponding treatment and IgG control groups using two-way ANOVA with Tukey's correction;  $F_{3,93}=42.78$ . n.s indicates  $P > 0.05$ .



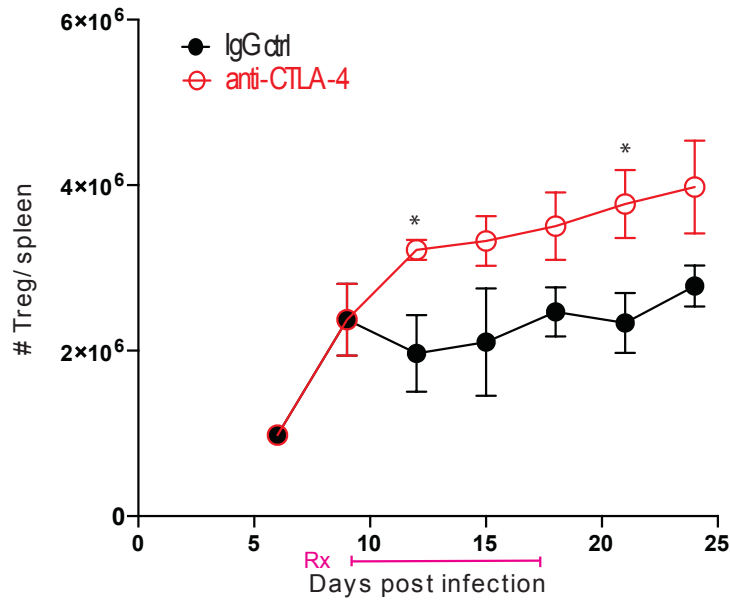

**Supplementary figure 9: CTLA-4 blockade does not deplete Tregs after *Py* infection.**

Total numbers of  $\text{Foxp3}^+\text{CD4}^+$  Treg cells in spleen at various time points post *Py* infection in C57BL/6 mice with or without CTLA-4 blockade as in Figure 3(A). Data presented as mean  $\pm$  s.e.m at each time point or sera dilution and represent 1 of 3 separate experiments, each with at least 5 mice per group. \* indicates  $P \leq 0.05$  respectively, comparing the treatment and control groups at the indicated time points with two-tailed student t-tests.

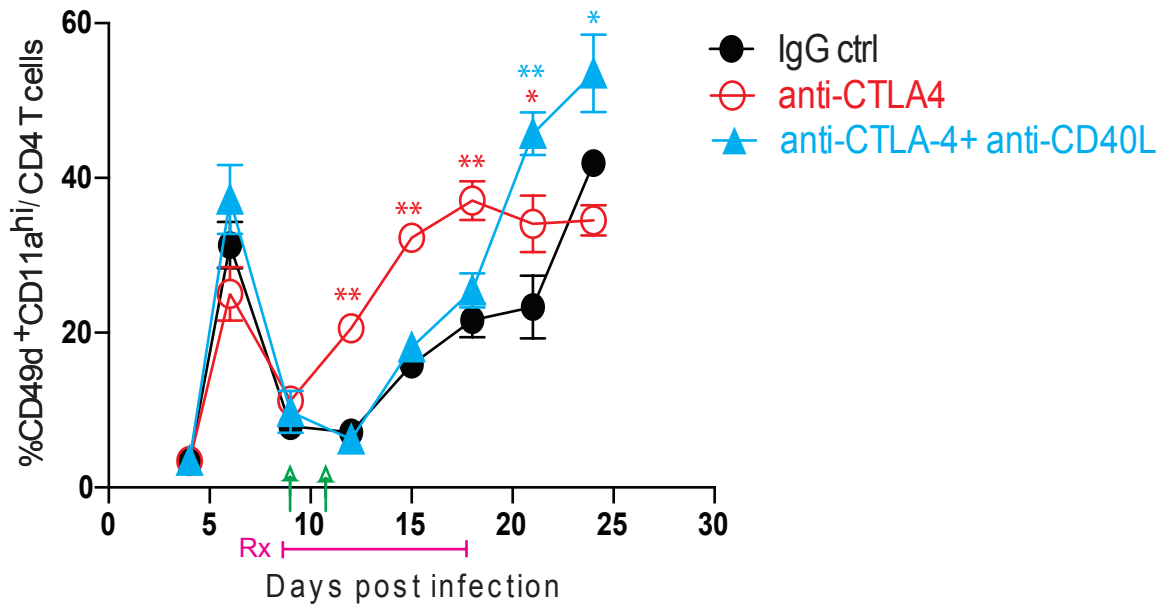

**Supplementary figure 10: GC B cell depletion stalls the recovery of CD4 T cell responses after CTLA-4 blockade in malaria.**

Frequencies of activated CD4 T cells in C57BL/6 mice at various time points post infection with *Py* and treated with anti-CD40L (9 and 11dpi, green arrows) and/or anti-CTLA-4 or control IgG as in Figure 3 (A). Data represent 1 of 2 separate experiments, each with 5 mice per group and is presented as mean  $\pm$  s.e.m. Color coded \* or \*\* indicate  $P \leq 0.05$  or  $0.01$  respectively, comparing the corresponding treatment and IgG control groups using two-way ANOVA with Tukey's correction;  $F_{3,114}=10.03$ .

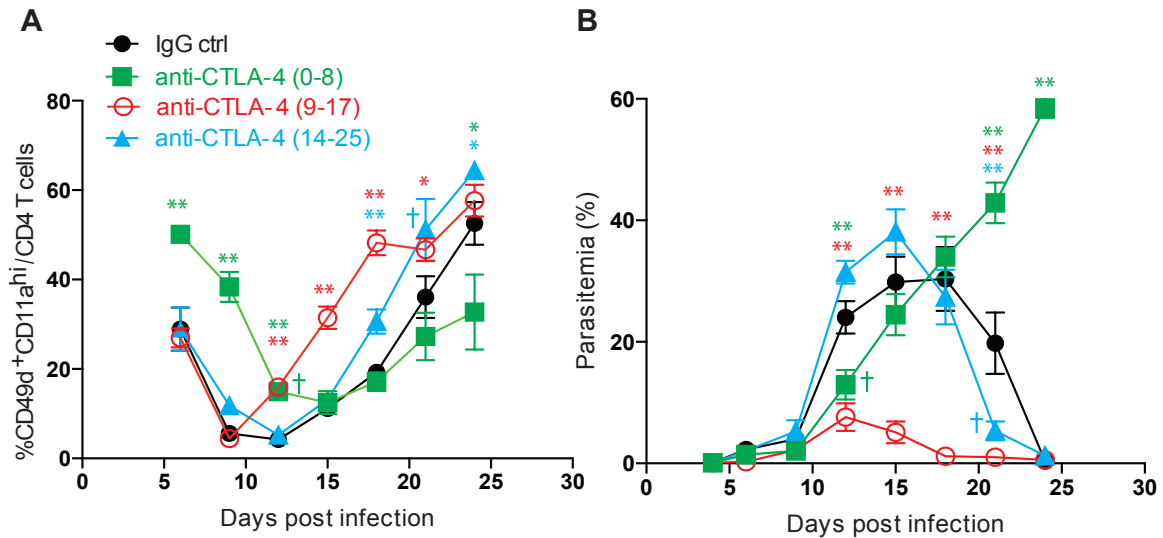

**Supplementary figure 11: CTLA-4 blockade coinciding with the expansion of Tregs and the Th cell hiatus is critical to control malaria.**

Frequencies of activated CD4 T cells (A) or parasitemia (B) in circulation in C57BL/6 mice at various time points post infection with *Py* and treated every other day, with anti-CTLA-4 or control IgG during the indicated time-window. Data compiled from 3 separate experiments, each with 5 mice per group and is presented as mean  $\pm$  s.e.m. Color coded \* or \*\* indicate  $P \leq 0.05$  or  $0.01$  respectively, comparing the corresponding treatment and IgG control groups using two-way ANOVA with Tukey's correction (A:  $F_{3,105}=13.89$ , B:  $F_{3,105}=89.14$ ). † indicates the death of one mouse in the corresponding color coded group.

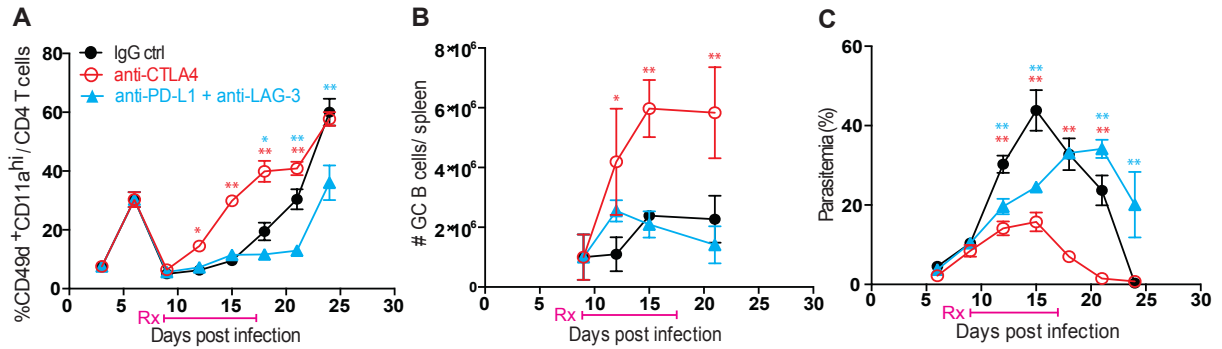

### Supplementary figure 12: PD-L1/ LAG-3 blockade during the hiatus in Th cell response does not enhance immunity to malaria

Frequency of activated CD4 T cells in blood (A), total CD95<sup>+</sup>GL7<sup>+</sup>CD19<sup>+</sup>B220<sup>+</sup>GC B cells in spleen (B) and the frequency of infected RBCs (C) in C57BL/6 mice at various time points post infection with *Py* and treatment from days 9-17 with anti-CTLA-4, anti PD-L1/LAG-3 antibodies or control IgG as indicated. Data represent 1 of 2 separate experiments with 5 mice per group and presented as mean  $\pm$  s.e.m. Color coded \* or \*\* indicate  $P \leq 0.05$  or  $0.01$  respectively, comparing the corresponding treatment and IgG control group using two-way ANOVA with Tukey's correction (A:  $F_{3,12}=45.36$ , B:  $F_{3,6}=40.14$ , C:  $F_{3,12}=56.82$ ).

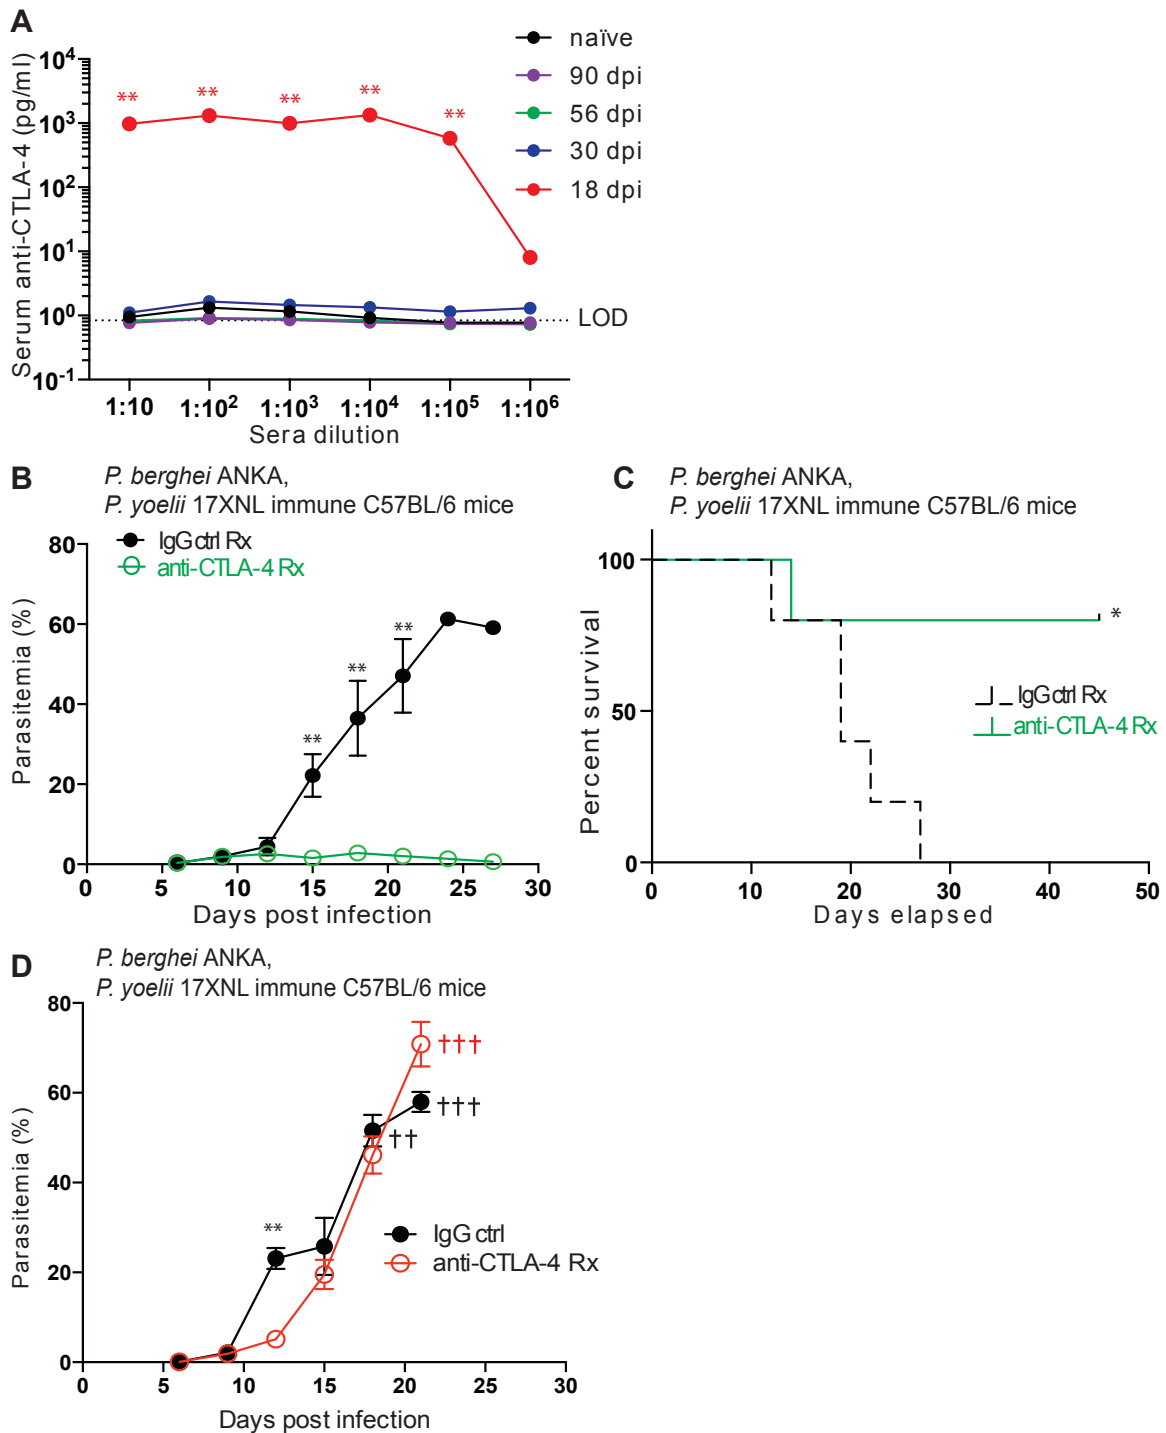

**Supplementary figure 13: CTLA-4 blockade imparts durable, cross species, Th cell dependent immunity to blood-stage malaria**

(A) Residual anti-CTLA-4 antibody in serum at various time points post *Py* infection in C57BL/6 mice treated with anti-CTLA-4 antibody, as in Figure 3(A), detected by ELISA. Data compiled from 2 biological replicates, where \* or \*\* indicate  $P \leq 0.05$  or  $0.01$  respectively, comparing the treatment and control

groups using two-way ANOVA with Dunnet's correction for multiple comparison. LOD indicates the limit of detection. (B-C) Parasitemia at the indicated time points (B) or survival (C) in mice treated as indicated in Fig 3(A), heterologously challenged with *P. berghei* at 110 dpi. (D) Frequency of infected RBC at the indicated time points in mice depleted of CD4 T cells prior to the heterologous *P. berghei* challenge above. Data represent 1 of 2 separate experiments, each started with 5 mice per group. Error bars represent s.e.m and \*or \*\*indicate  $P \leq 0.05$  or  $0.01$  respectively, comparing the treatment and control groups at the indicated time points with two-tailed student t-tests (B, D) or Mantel-Cox chi-square test (C).

*P. yoelii* 17XNL, C57BL/6 mice

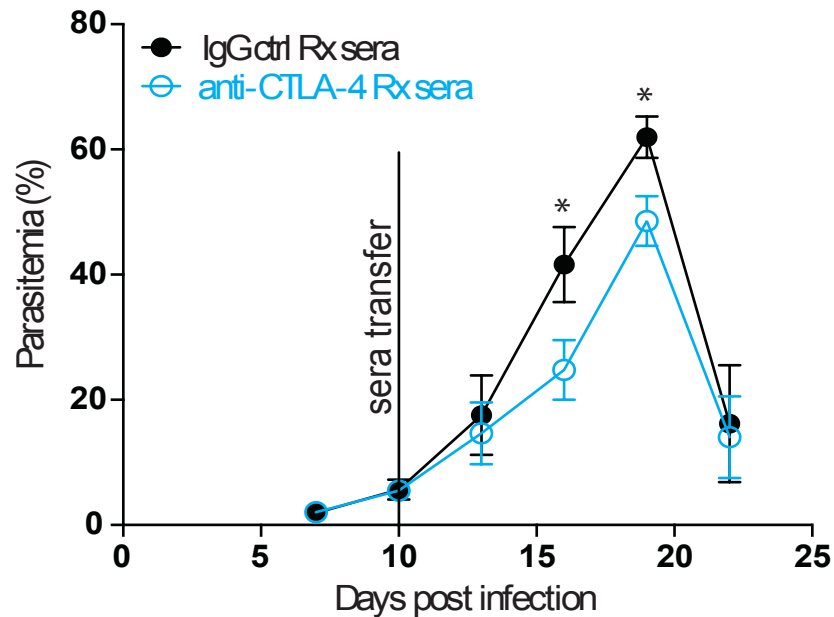

**Supplementary figure 14: CTLA-4 blockade enhances passive humoral immunity to malaria.**

Parasitemia at the indicated time points in *Py* infected C57BL/6 mice that received sera (100 $\mu$ l) at 10 dpi, obtained from donor mice in Figure 4(A), at 56 dpi. Data represent 1 of 2 separate experiments, each with 5 mice per group. Error bars represent s.e.m and \* indicate  $P \leq 0.05$ , comparing the groups at the indicated time points with two-tailed student t-tests.

**Supplementary Video S1: CD4 T:B cell clusters in splenic GCs of *Py* infected mice.**

Immunofluorescence microscopy and 3D volumetric reconstruction of the splenic architecture showing T cell zones (CD4<sup>+</sup>, pseudocolored green) B cell follicles (B220<sup>+</sup>, pseudocolored blue), GC reaction (GL7<sup>+</sup>, pseudocolored grey) and plasmablasts (CD138<sup>+</sup>, pseudocolored red) from a C57BL/6 mouse inoculated with *Py*, 27dpi. Plasmablasts and CD4 T cell: B cell clusters within the GC are visible from 00:00:17s. Video representative of at least 5 regions observed in 9 sections examined from 3 separate mice from 3 separate experiments.

**Supplementary Video S2: Tfh:B:Tfr cell clusters in splenic GCs of *Py* infected mice**

Immunofluorescence microscopy and 3D volumetric reconstruction of the splenic GC and surrounding structures showing clusters of Tfh cells, B cells and Tfr cells seen in the GC; from a C57BL/6 mouse infected and treated with anti-CTLA-4 as in Figure 2G, 15dpi. CD4 is pseudocolored green, B220 blue, Nrp-1 grey and CTLA-4 red. Video representative of at least 5 regions observed in 9 sections examined from 3 separate mice from 3 separate experiments.

**Supplementary Video S3: Close apposition of B cells and Tfr cells in GCs of *Py* infected mice**

Higher magnification Immunofluorescence microscopy and 3D volumetric reconstruction of splenic GC (represented in Fig 2G, middle panel) showing close apposition of B cells and Tfr cells from a *Py* infected C57BL/6 mouse infected, 21dpi. B220 is pseudocolored blue, Foxp3 grey and CTLA-4 red. Video representative of at least 5 regions observed in 9 sections examined from 3 separate mice from 3 separate experiments.

**Supplementary Video S4: CTLA-4 on the B cell surface proximal to Tfr cell in a Tfh:B:Tfr cell cluster**

Immunofluorescence microscopy and 3D volumetric reconstruction of a single Tfh:B:Tfr cell cluster showing B:Tfr cell interaction in the lymph node of a *Py* infected C57BL/6 mouse, 21dpi. B220 is pseudocolored blue, Nrp-1 grey and CTLA-4 red. Video representative of at least 5 regions observed in 9 sections examined from 3 separate mice from 3 separate experiments.

**Supplementary Video S5: Tfr cells transiently interact with B cells in the splenic GCs of *Py* infected mice.**

Intravital confocal immunofluorescence microscopy (total duration= 30 mins) of spleen in *Py* infected Foxp3-GFPx Bcl-6-RFP.B6 mice, 21 dpi. B220 is pseudocolored blue. Tfr cells (Foxp3<sup>+</sup>Bcl6<sup>+</sup>) appear yellow, B cells blue, GC B cells (B220<sup>+</sup>Bcl6<sup>+</sup>) magenta and Tfh cells (B220<sup>-</sup>Bcl6<sup>+</sup>) red. Video represents 1 of 12 different regions imaged in three separate mice.



**Supplementary table 1: Demographics and parasitemia data of study subjects in the cohort.**

| <b>Subject ID</b> | <b>Age (yrs)</b> | <b>Gender</b> | <b>Ethnicity</b> | <b>Before Malaria Parasitemia (Parasites/ uL blood)</b> | <b>Febrile Malaria Parasitemia (Parasites/ uL blood)</b> |
|-------------------|------------------|---------------|------------------|---------------------------------------------------------|----------------------------------------------------------|
| 435               | 9                | M             | Bambara          | 0                                                       | 10875                                                    |
| 443               | 9                | M             | Bambara          | 0                                                       | N/A                                                      |
| 453               | 9                | F             | Bambara          | 0                                                       | 14175                                                    |
| 461               | 8                | F             | Bambara          | 0                                                       | 7850                                                     |
| 467               | 8                | M             | Bambara          | 0                                                       | 18525                                                    |
| 512               | 7                | F             | Bambara          | 0                                                       | 7875                                                     |
| 517               | 7                | M             | Bambara          | 0                                                       | 6575                                                     |
| 523               | 6                | M             | Bambara          | 0                                                       | 17050                                                    |
| 548               | 6                | M             | Bambara          | 0                                                       | 3300                                                     |
| 554               | 5                | M             | Bambara          | 0                                                       | 23325                                                    |
| 566               | 5                | M             | Bambara          | 0                                                       | 13325                                                    |
| 575               | 5                | M             | Other            | 0                                                       | 8625                                                     |
| 576               | 5                | M             | Bambara          | 0                                                       | 11400                                                    |
| 581               | 4                | M             | Bambara          | 0                                                       | 13325                                                    |
| 583               | 4                | M             | Bambara          | 0                                                       | 15075                                                    |
